## Goat kid recognition of their mothers' calls is not impacted by changes in source-filter parameters.

2

4 Tania Perroux<sup>1,2</sup>, Alan G. McElligott<sup>3,4</sup>, Elodie F. Briefer<sup>2</sup>

<sup>1</sup>Department of Veterinary Clinical Sciences; Jockey Club College of Veterinary Medicine and Life Sciences, City University of Hong Kong, Hong Kong SAR, China

6

<sup>2</sup>Behavioral Ecology Group, Section for Ecology and Evolution, Department of Biology, University of Copenhagen, Copenhagen, Denmark

8

<sup>3</sup>Department of Infectious Diseases and Public Health, Jockey Club College of Veterinary Medicine and Life Sciences, City University of Hong Kong, Hong Kong SAR, China

10

<sup>4</sup>Centre for Animal Health and Welfare, Jockey Club College of Veterinary Medicine and Life Sciences, City University of Hong Kong, Hong Kong SAR, China

12

14 Corresponding authors:

TP: [tperroux2-c@my-cityu.edu.hk](mailto:tperroux2-c@my-cityu.edu.hk) ; Yeung Kin Man Building, City University of Hong Kong, Kowloon, Hong Kong

16

EFB: [elodie.briefer@bio.ku.dk](mailto:elodie.briefer@bio.ku.dk) ; Behavioral Ecology Group, Section for Ecology and Evolution, Department of Biology, University of Copenhagen, 2100 Copenhagen, Denmark

18

20 Short title for page headings: “Goat kid recognition of mother calls”

## Abstract

22

Features varying more between than within individuals are usually considered as potential  
24 cues for individual recognition. According to the source-filter theory of vocal production, the  
fundamental frequency of mammal's vocalisations depends on the characteristics of the vocal  
26 folds, while formants are determined by the characteristics of the vocal tract. Goat mothers  
and their kids (*Capra hircus*) display mutual recognition, and both source-related parameters  
28 (F0) and filter-related ones (formants) have been shown to be individualised in their  
vocalisations. Here, we aimed to identify if these parameters (source-related parameters (F0)  
30 and/or filter vocal parameters) are used by goat kids to recognise their mother's vocalisations.  
To this aim, we used an algorithm to modify either F0 or formants of the calls of goat mothers  
32 to different degrees (within or exceeding the range of natural intra-individual variability), and  
we played back these modified calls to their kids. We did not observe any difference in the kid  
34 reactions to the modified maternal vocalisations and to the natural calls. We suggest that  
either: (i) fundamental frequency and formants are not involved in maternal recognition in  
36 goats; (ii) goat kids have a tolerance for variation when recognising their mother's calls that  
exceeds the shifts we performed; (iii) goat maternal recognition is based on other vocal  
38 features than those tested here, or (iv) goat kid maternal recognition is based on a  
combination of different features and might be more flexible than previously thought, such that  
40 when one main feature is modified, kids focus on other features.

42

Key words: bioacoustics, *Capra hircus*, mother-offspring relationships, source-filter theory,  
44 vocal communication, vocal recognition

## Introduction

46

Individual recognition is crucial for directed parental care (Briefer & McElligott, 2011a; Gokcekus *et al.*, 2021; Searby & Jouventin, 2003), as well as for offspring survival (Padilla de la Torre *et al.*, 2016). Parent-offspring recognition develops quickly and is influenced by environmental constraints (Briefer *et al.*, 2012). Mother-offspring recognition at a distance mostly relies on visual and acoustic cues to infer the position of the young/parent, while recognition at close quarters is mostly sustained by olfaction (Ferreira *et al.*, 2000; Torriani, Vannoni & McElligott, 2006). In larger groups where risks of confusion are enhanced, accurate parent-offspring recognition prevents misdirected maternal care; particularly when the neonate depends entirely on its mother for food and/or when lactation requires a lot of energy (Sèbe *et al.*, 2010; Linossier *et al.*, 2021).

56

Vocalisations play an important role in individual recognition (Yorzinski, 2017). To enable vocal recognition, features typically vary more between than within individuals (Li *et al.*, 2017). In species where contact calls have been shown to be individualised, offspring react more to the calls of their mothers compared to calls from other females. For example in ungulates, calves (*Bos taurus*) stay for longer near and approach closer a loudspeaker broadcasting their mother's voice compared to one broadcasting another female's voice (Padilla de la Torre *et al.*, 2016). Ungulate offspring can use cues in both the frequency and temporal domains for maternal recognition (Charrier, Mathevon & Jouventin, 2003), with for instance sheep (*Ovis aries*) showing an early filial preference that depends on acoustic cues (Sèbe *et al.*, 2007, 2010).

66

In goats (*Capra hircus*), mothers and kids have individualised contact calls (Briefer & McElligott, 2011a). Goats vocalisations are characterised by a clear harmonic structure, as well as strong frequency and amplitude modulations (Briefer *et al.*, 2012). When isolated,

68

70 goats produce two types of calls: contact calls and isolation calls, the latter characterised by  
higher pitch (Briefer & McElligott, 2011a; Siebert *et al.*, 2011). Contact calls are produced  
72 either open or closed mouthed, with close mouth altering the formant structure (Favaro,  
Briefer & McElligott, 2014). Sibling goat kids have more similar vocalisations compared to  
74 unrelated goat kids, and this effect is not dependent on sex nor experience (Burke *et al.*,  
2020). However, goats also show some flexibility in their calls during development: the call of  
76 young kids living in the same group converge over time and become more similar than those  
raised in different groups (Briefer & McElligott, 2012).

78 Goat mother-offspring relationships are characterised by a specific, rapidly formed and fairly  
stable maternal attachment (Hernández *et al.*, 2012), leading to mutual recognition (Briefer &  
80 McElligott, 2011a). Mothers develop acoustic recognition and discrimination of their kid's  
contact call, which remains even after weaning and long-term separation (Briefer *et al.*, 2012).  
82 Similarly, from five days old at least, goat kids have been shown to differentiate between the  
calls of their mothers and other familiar females based on vocal cues (Briefer & McElligott,  
84 2011a), although the precise features used in vocal recognition are not yet known. This  
mutual mother-kid recognition could be based notably on the fundamental frequency (F0;  
86 "source", which depends on the characteristics of the vocal fold) and/or on the formants  
("filter", which are determined by the characteristics of the vocal tract). Indeed, both F0 and  
88 formants have previously been identified as potential markers of individuality in goat kids'  
bleats (Briefer & McElligott, 2011a) .

90 There are two types of paradigms to evaluate the cues used in vocal discrimination. First,  
investigating the extent to which vocal features are stable within individuals (*i.e.*, stereotypic)  
92 can be used to determine the likelihood that a certain feature will be involved in individual  
recognition (Pitcher, Harcourt & Charrier, 2012; Sauv e *et al.*, 2015). Second, playbacks can  
94 be carried out with modified calls in which features potentially used for individual recognition

are altered one by one, while keeping the rest constant. These modified calls can then be  
96 played to the animals to assess whether these changes impair recognition (Charrier *et al.*,  
2003; Tamura *et al.*, 2021). If recognition is impaired by the modification of a parameter, this  
98 suggests that it is used for recognition. Such experiments have shown, for example, that  
Australian sea lions (*Neophoca cinerea*) pups respond less to their mother's calls when F0  
100 has been shifted (once, twice or three times the standard deviation) than to natural calls,  
suggesting that they use this vocal feature for maternal recognition (Charrier, Pitcher &  
102 Harcourt, 2009).

The present study was focus on determining if source-filter vocal parameters (*e.g.*, F0 and/or  
104 formant frequencies) are used by goat kids to recognise their mother's vocalisations. To this  
aim, we played back the vocalisations of mothers to their kids, where either F0 or formants  
106 had been modified to different degrees (within or exceeding the range of natural intra-  
individual variability). We predicted that, if a feature is involved in vocal recognition, kids would  
108 react less to the modified vocalisation than to the natural one, as the modification impairs  
recognition (Charlton, Huang & Swaisgood, 2009a; Charrier *et al.*, 2009).

## 110 **Material and Methods**

### *Subjects and housing*

112 Our subjects were 14 goat kids (six females and eight males), born from seven multiparous  
114 pygmy goat mothers and the same father in spring (n = 10) and summer 2011 (n = 4). All kids  
116 were born and raised at the WhitePost Farm (53°06'N, 1°03'W, UK). Kids' age ranged from 10  
118 to 28 days (mean 17.08 ± 5.28 days) at the time of playbacks. The goats used in this study  
120 were kept indoors in a communal pen of 4.4 m × 4.5 m. Following the husbandry routine  
carried out by the farm employees, females who were about to give birth were isolated in a  
2.5 m<sup>2</sup> pen within the communal pen and kept there with their kid(s) for two to three days. The  
aim was to allow adequate development of the mother–offspring relationship and prevent  
interference from other goats. Mothers and kids were then released in the communal pen.

### *Playback preparation*

122 The mothers' calls were recorded two to five days before the playbacks, by separating kids  
124 from their mothers behind a fence (1–10 m) for no more than five minutes, two times a day, to  
elicit contact calls. Calls were recorded at a distance of 1–5 m from the mother using a  
126 Sennheiser MKH70 connected to a Marantz PMD660 recorder (sampling rate: 44.1 kHz) (see  
Briefer and McElligott, 2011b, 2012 for further details about the procedure). Open-mouth  
128 contact calls were then saved on a computer in wav, 16-bit, and visualised on spectrograms in  
Praat v.5.0.47 DSP Package (Boersma and Weenink, 2009) (window length = 0.01 s, dynamic  
130 range = 50 dB). Eight good-quality calls per individual (low level of background noise) were  
selected for preparing the playback treatments.

132 To determine to which degree F0 and formants should be modified, the intra and inter-  
individual variability of the mean F0 frequency value across the call ('F0Mean') and the mean  
134 frequency value of the fourth formant ('F4Mean') were measured based on eight calls from 11

adult goats recorded previously (Briefer & McElligott, 2011b). This sample of individuals  
136 included the seven mother goats whose calls were played back to kids in the current study.  
The fourth formant was chosen for analyses as it is the most salient and easy to measure  
138 (Briefer & McElligott, 2011b). The intra-individual variation (maximum – minimum value for  
each individual) was as follows (mean  $\pm$  SD): F0Mean = 66.05  $\pm$  36.52 Hz, F4Mean = 521.24  
140  $\pm$  262.17 Hz. The first modified call treatment was aimed to mimic a shift in F0 or formants  
that was within the extreme range of within-individual variation, while the second treatment  
142 was aimed to mimic a shift outside this range. Based on the intra-individual variation values,  
we determined the first shift to be of about 70 Hz above the natural signal for F0Mean ('F0  
144 Shift1') and of about 520 Hz for F4Mean ('Formant Shift1'), and of about twice these values  
for the second shift (160 Hz for F0Mean ('F0Shift2') and 1040 Hz for F4Mean ('Formant  
146 Shift2')).

The preparation and modification of the sequences to play back was carried out in Praat as  
148 follows: the eight selected calls were inserted in a sequence, interspaced by intervals of  
natural duration (0.98 s for adult goats: Briefer & McElligott, 2011b), made of the goat's usual  
150 background noise. The sequence was then repeated to obtain a 30 s long sequence. For twin  
kids (n = 7 pairs), the same mother calls were used but they were inserted in a different order  
152 in the sequence. All calls in a given sequence were then rescaled to the same maximum  
amplitude. Following this sequence preparation, F0 and formants were modified  
154 independently using a PSOLA-based algorithm with a custom Praat script (Pitcher, Briefer &  
McElligott, 2015), which shifted the F0 or formant up by a predetermined resynthesis factor,  
156 supposedly leaving the other acoustic parameters (e.g., formant and F0, respectively)  
unchanged. To define the predetermined resynthesis factor needed, the first call of each  
158 sequence was analysed to extract its F0Mean and F4Mean. Based on these extracted values,  
a resynthesis factor of 1.21 to 1.80 was used for F0 Shift1, and of 1.50 to 2.82 for F0 Shift2.

160 For F4Mean, a resynthesis factor of 0.85 to 0.89 was used for Formant Shift1, and of 0.74 to  
0.80 for Formant Shift2.

162 Modified calls of the mothers were examined to verify the modification and the absence of  
artefacts (Fig. 1). In addition, the eight vocalisations constituting the sequence for each  
164 mother and in each treatment were then analysed using a script adapted from Reby and  
McComb (2003) and Charlton, Zhihe & Snyder (2009b), to obtain the precise F0 and formants  
166 values of all natural and modified calls played back. To do so, the following settings were  
used: Source-related vocal parameters (F0 mean, minimum, maximum values and range)  
168 were measured by extracting the fundamental frequency contour of each call using a cross-  
correlation method ([Call: To Pitch (cc) command], F0: time step = 0.01 s, pitch floor = 70 Hz,  
170 pitch ceiling = 750 Hz). Filter-related (formants) vocal parameters (F1, F2, F3 and F4 mean  
values and formant dispersion) were measured by extracting the contour of the first four  
172 formants of each call using Linear Predictive Coding analysis (LPC; [Call: To Formant (burg)  
command], time step = 0.01 s, maximum number of formants = 4, maximum formant = 5000  
174 Hz (natural calls) to 6750 Hz (Formant Shift2), window length = 0.1 s).



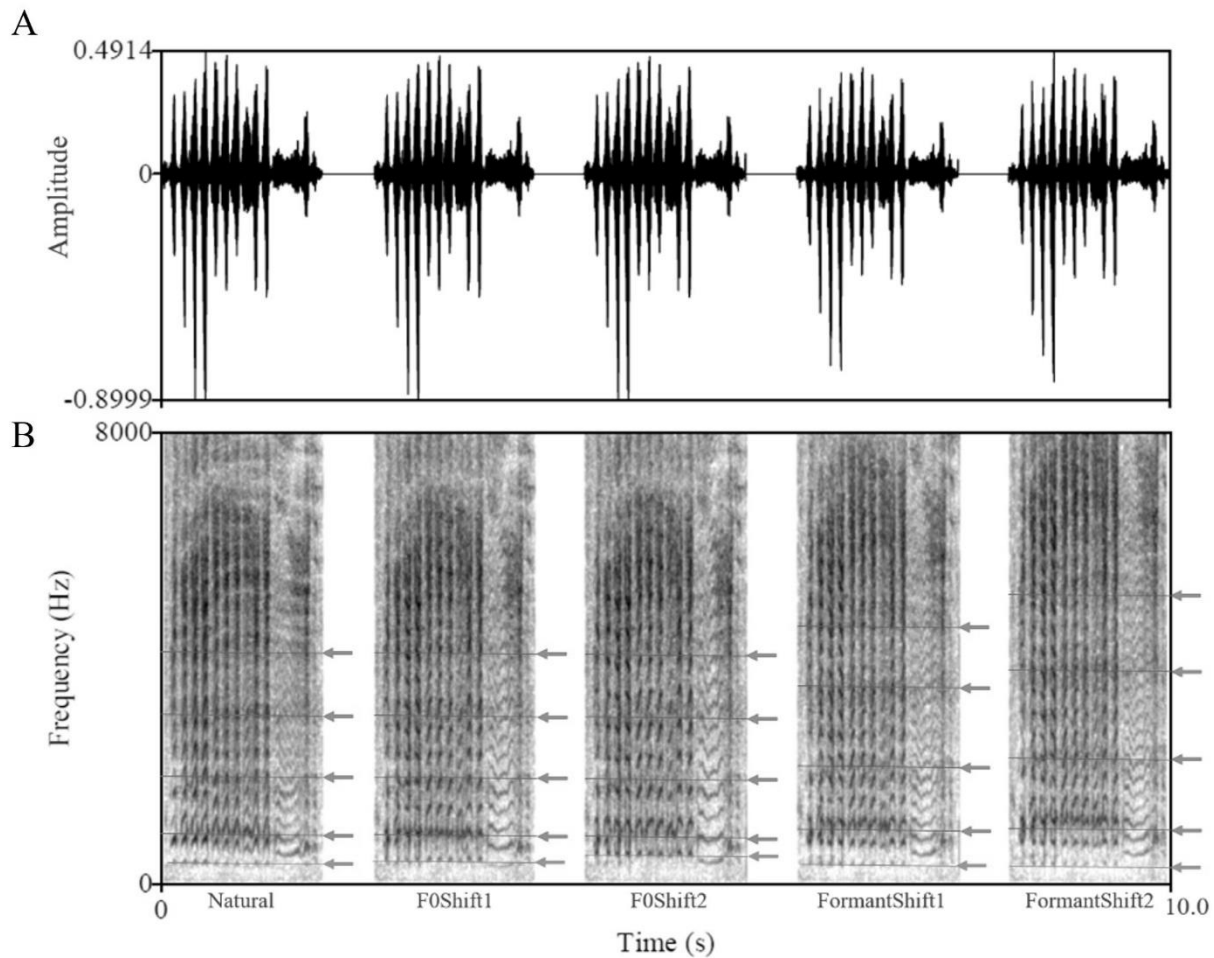

176 Figure 1: Example of a mother goat call oscillogram (A) and spectrogram (B) for each treatment.  
178 Arrows on the spectrograms indicate the Fundamental frequency F0 (blue arrow) and the first  
178 four formants (red arrow).

### 180 *Experimental set up*

182 The playback experiment was carried out in a 2.5 m<sup>2</sup> arena situated within the same barn but  
182 outside visual and hearing range from the kids' home pen. The testing arena was placed  
184 within a pen containing other species, to which the subjects were habituated to (*i.e.*, sheep  
184 and llamas), surrounded on two sides by concrete walls, and on the two others by goat fences  
(Fig. 2). To prevent disturbance from other animals, one side was covered with a blanket. The  
186 loudspeaker and the camera were placed on the adjacent side, at about 2-4 m from the

subject. The floor was covered with straw. Subjects were habituated to the pen for five  
188 minutes per day, alone, during three to four days before the first playback trial started.

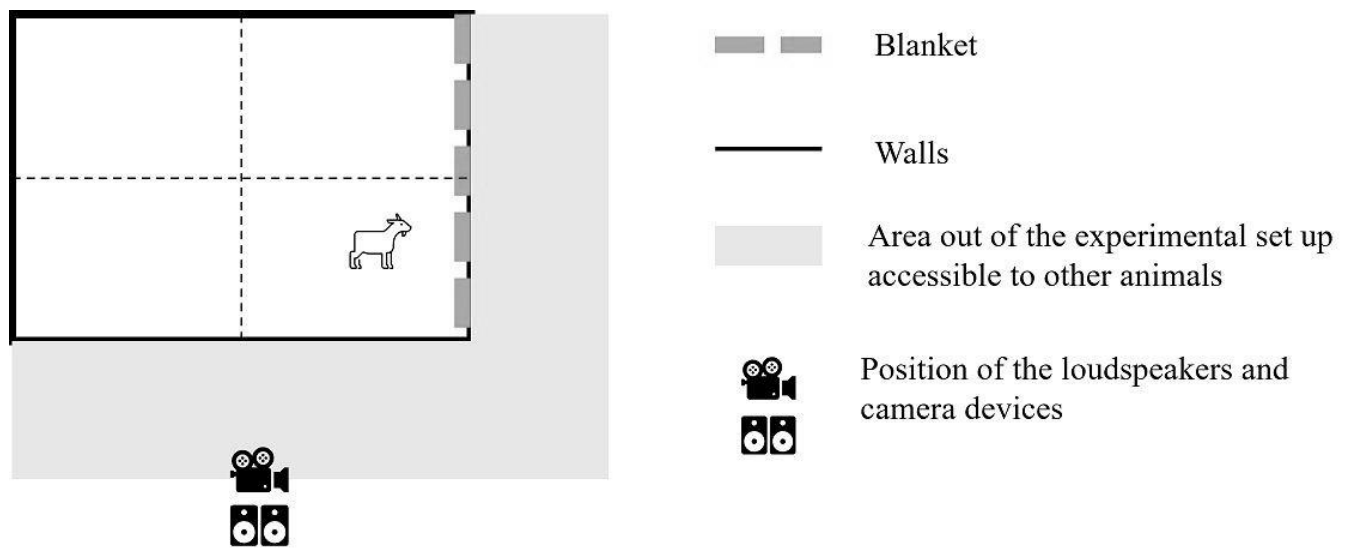

190 Figure 2: Schematic representation of the experimental set used during the playback  
sessions. Loudspeaker and camera devices were positioned about two meters away from the  
192 fences. A blanket was installed to reduce disturbance from surrounding animals that could  
pass by the experimental set up.

### 194 *Experimental procedure*

196 Following Briefer and McElligott (2011b), after ensuring that it suckled from its mother before  
starting the procedure, each kid was placed with other pen mates (two to four kids together)  
198 for 1.5 to 2 h in the experimental set up before the first trial started, to trigger responses to  
maternal calls and allow the subjects to habituate to the pen. At the end of this habituation  
200 period, the other pen mates were removed and the playback experiment started when subject  
was settled (*i.e.*, did not show any obvious signs of stress, such as calling or defecating). The  
202 call treatments, stored as high-quality mp3 files (sampling rate = 44.1 kHz; bit rate = 224  
kbps), were played using a Skytronic TEC076 portable system (frequency response: 50 Hz–  
204 20 kHz  $\pm$  3 dB), at an intensity estimated to be normal for the goats (80 dB at 1 m; Briefer &

McElligott, 2011b). Each kid was tested with the five playback treatments on two to three  
206 consecutive days (one to three treatments per day). To ensure relatively similar conditions  
and kid age between playbacks of F0 and formant modifications, respectively, the order of  
208 testing condition were pseudo-randomised: the natural condition could take place in any of the  
five trials, but F0 tests would take place on either the first, second or third trial of testing  
210 whereas formant tests would occur on either the third, fourth or fifth trial. The behavioural  
response of the animals was recorded using a Sony DCR-SX50E camcorder. Kids were  
212 returned to their mother directly after each test.

#### 214 *Video analysis*

The videos of the playbacks were scored while blind to the treatment. The behaviours were  
216 scored continuously, during the period preceding the playback ('Pre-playback'; duration:  $40.93$   
 $s \pm 6.06$ ) and the rest of the video corresponding to the playback itself ('Playback'; duration:  
218  $37.27 s \pm 4.37$ ) using the software BORIS v7.9.8 (Friard & Gamba, 2016). The coded  
behaviours were as follow: looking towards the loudspeaker (evaluated with a  $45^\circ$  angle of  
220 head in direction to the device), locomotion (with four legs moving), call (vocalisations of the  
goat kid) and latencies of the first call, locomotion and look towards the speaker after the  
222 playback onset. Except for latencies, all behaviours were divided by the duration of the  
experimental phase for further analysis , resulting in 'rates' for events (number of occurrence /  
224 observation duration), and 'ratios' for states (duration of the state / observation duration).

To ensure reliability of the video coding, the intra-observer reliability (Bateson & Martin, 2021)  
226 was calculated using the following procedure: 10 randomly selected videos were encoded  
twice in a random order. For each behaviour, a correlation coefficient ( $r^2$ ) was then calculated  
228 using a Pearson correlation test. For all behaviours, we obtained an  $r^2 \geq 0.79$  (mean = 0.95;  
range = 0.79-0.99), suggesting good intra-observer reliability (*Table S1*).

230

### *Statistical Analysis*

232

Statistical analyses were conducted with RStudio (v1.3, R Core Team). The effects of F0 and formant manipulations were analysed separately. The dataset was hence split as follows: F0 conditions (natural, F0 shift1 and F0 Shift2) and Formant conditions (natural, Formant Shift1 and Formant Shift2). The same procedure (points 1-3 below) was applied to the two sub-datasets.

236

238

1) For behaviours that could be measured before and after the playback onset (*i.e.*, all except the latencies to respond to the playback), a comparison was made between these two periods to select behaviours that could be considered as a reaction to the calls (*i.e.*, that were affected by the auditory stimuli). To this aim, a Linear Mixed-Effect Models (LMM) was ran for each behavioural response, including the behavioural response as the outcome variable, the period (before or after playback) as a fixed factor and the identity of the subject nested within the identity of its mother as a random factor. Behaviours that differed significantly between the two scoring periods were selected for further analyses.

240

242

244

246

2) To test for the effect of the playback treatment on the responses of the kids, for each extracted acoustic parameter, the mean acoustic values of the calls of each mother in each treatment were subtracted to the mean value of the natural treatment, to obtain the actual shift (*i.e.*, the natural vocalisation was therefore fixed at zero, and each value given actually refers to that difference, hereafter “playback shift”). One LMM model was built for each selected behaviour, entered as an outcome variable, and for each acoustic parameter measured (F0: mean (‘Mean F0’), minimum (‘Min F0’), maximum (‘Max F0’) values and range (‘Range F0’); and formants: (Mean F1, F2, F3 and F4 values and formant dispersion), whose playback shift values were entered as a continuous fixed factor (Total: 24 models for the F0 data subset, and 30 for the formant subset). In addition, we included the order of the treatments (one to

248

250

252

254

five), as well as the pre-playback behaviour, as fixed continuous control factors. The identity of the subject nested within the identity of its mother was used as a random effect to control for repeated measurements of the same subjects and potential similarities between twins.

3) We then investigated the impact of modifying F0 on formants, and vice versa, in order to validate our PSOLA-algorithm procedure. To this aim, we ran further LMMs including the mean value, for each playback sequence of each mother's calls, of the vocal parameters extracted from the acoustic analyses of the calls played back as an outcome variable (in separate models, F0 values: Mean F0, Min F0, Max F0 and Range F0; and formants values: Mean F1, F2, F3 and F4 values and formant dispersion). Each model included the playback condition as a fixed effect (*i.e.*, Natural, Formant Shift1 and Formant Shift2 for LMM carried out on F0 values and Natural, F0 Shift1 and F0 Shift2 for LMM carried out on formant values), and the identity of the mother as a random factor. For models where the treatment had an effect on the acoustic features, post-hoc Tukey tests were conducted. The results of these models can be found in supplementary material (*Tables S2 and S3*).

For all LMMs, we checked the residuals of the models graphically for normal distribution and homoscedasticity (`simulateResiduals` function, package `DHARMA`, Hartig, 2022). If the assumptions were not met, a logarithmic transformation was used. When the assumptions of normality and homoscedasticity were not met despite a logarithmic transformation, the data were transformed to binary data (superior to the median in the treatment = 1, inferior to the median = 0) and input into Generalized Linear Mixed-Effect Models (GLMM) instead of a LMM, with the same fixed, control and random factors (function `glmer`, package `lme4`; Bates *et al.*, 2015). Precise types of models can be found in the supplementary material (*Table S4*). P-values were calculated by comparing model with and a model without the term of interest using parametric bootstrap methods (1000 bootstrap samples; `PBmodcomp` function, package

pbkrtest, Halekoh & Højsgaard, 2014). To this aim, models were fitted with maximum  
280 likelihood.

One of the mothers died due to causes unrelated to the experiment during the testing period  
282 (between playback sessions). To ensure that the responses of her twin offspring did not differ  
from those of other kids, Wilcoxon signed rank exact tests were used to compare the mean  
284 values of each behaviour in each treatment including the responses from these two kids with  
the variance when the response of these kids after their mother's death were excluded (three  
286 trials for one kid and four trials for the other kid). Since these differences were not significant  
(F0:  $V = 39$ ,  $p\text{-value} = 0.144$ ; Formants:  $V = 88$ ,  $p\text{-value} = 0.546$ ), the responses of these two  
288 kids were included in analyses.

### 290 *Ethical Note*

Animal care and all experimental procedures were in accordance with the International  
292 Society for Applied Ethology guidelines("Guidelines for the treatment of animals in behavioural  
research and teaching," 2012). The experiments were carried out in 2011. At that time, no  
294 ethical approval was required in the UK for such non-invasive playback experiments.

## Results

### *Behaviours affected by the playback*

For both F0 and formant conditions, the following goat kid behaviours significantly differed between before and after the playback onset: call rate (LMM: F0,  $p < 0.0001$ ; formants,  $p < 0.0001$ ), locomotion ratio (LMM: F0,  $p < 0.05$ ; formants,  $p < 0.05$ ) and looking ratio (LMM: F0,  $p < 0.01$ ; formants,  $p < 0.01$ ). These behaviours and the corresponding latencies were therefore selected for further analysis.

### *Effect of F0 modifications on maternal recognition*

F0 modifications did not affect kid responses to the playbacks (Table 1; e.g., Fig. 3). The order in which goat kids underwent the treatments had a significant effect on nine models for behaviours coded as rates and ratios (call, locomotion and looking towards the speaker) out of 12 and did not impact the models for latencies (Table S5). Goat kid's behaviour before playback onset affected their behaviour after the onset on all models for all behaviours coded as rates and ratios (Table S6).

Table 1: Effect of actual shifts in F0 among playbacks of natural calls (no shift), F0 Shift1 (*i.e.*, within the natural variability) and F0 Shift2 (*i.e.*, exceeding the natural variability of the mother's vocalisation) on goat kids' behaviours. F0 values were obtained by subtracting each mean frequency value of the playback sequence to the mean values of the natural playback of the corresponding individual, giving a value of zero for the natural call. Linear Mixed-Effect Models (LMMs; p values extracted using parametric bootstrap) did not reveal any significant effect of the shifts on goat kids' behaviour. In bold are the lowest p values, whose relationships are illustrated in Fig. 3

| P-values | Latency<br>Call | Latency<br>Locomotion | Latency<br>Look | Call Rate | Locomotion<br>Ratio | Looking<br>Ratio |
|----------|-----------------|-----------------------|-----------------|-----------|---------------------|------------------|
| Max F0   | 0.652           | 0.377                 | 0.366           | 0.649     | 0.289               | 0.646            |
| Mean F0  | 0.519           | 0.293                 | 0.247           | 0.377     | 0.159               | 0.433            |
| Min F0   | 0.484           | 0.515                 | 0.236           | 0.482     | 0.156               | 0.291            |
| Range F0 | 0.851           | 0.624                 | 0.989           | 0.738     | 0.766               | 0.442            |

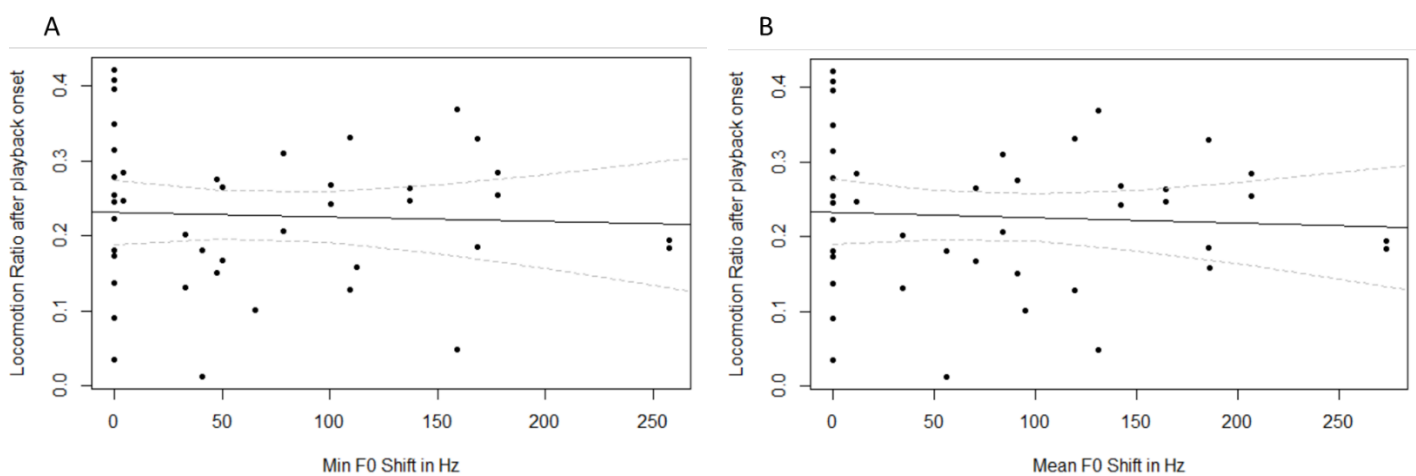

320 Figure 3: Effect of the actual shift in minimum (A) and mean (B) F0 on locomotion ratio (time  
 322 spent performing the behaviour divided by the total duration of the video sequence) after  
 324 playback onset over the three treatments: natural voice of the mother (set at 0 Hz), a positive  
 326 shift within the natural range (about 70 HZ above natural F0 Mean) and a positive shift  
 exceeding the natural range (about 160 HZ above natural F0 Mean). Dots represent the data,  
 and the black line represent the predicted effect given by the LMM model. In grey are given the  
 95% predicted confidence intervals.

### 328 *Effect of formants modifications on maternal recognition*

330 Formant modifications did not affect kid responses to the playbacks (Table 4; e.g., Fig. 4). The  
 order in which kids underwent the treatments had a significant effect on all models for



locomotion and looking towards the loudspeaker latencies, and for call and locomotion ratios  
 332 (*Table S7*). Goat kid's behaviour before playback onset affected their behaviour after the  
 onset on all models for call rate and locomotion ratio (*Table S8*).

334 Table 2: Effect of actual shifts in Formants among playbacks of natural calls (no shift), Formant  
 Shift1 (i.e., within the natural variability) and Formant Shift2 (i.e., exceeding the natural  
 336 variability of the mother's vocalisation) on goat kids' behaviours. Formant values were obtained  
 by subtracting each mean frequency value of the playback sequence to the mean values of the  
 338 natural playback of the corresponding individual, giving a value of zero for the natural call. Linear  
 Mixed-Effect Models (LMMs; p values extracted using parametric bootstrap) found no significant  
 340 effect of the shifts on goat kids' behaviour. In bold are the lowest p values, whose relationships  
 are shown in Fig. 4.

| P-values   | Latency<br>Call | Latency<br>Locomotion | Latency<br>Look | Call<br>Rate | Locomotion<br>Ratio | Looking<br>Ratio |
|------------|-----------------|-----------------------|-----------------|--------------|---------------------|------------------|
| Mean F1    | 0.306           | 0.506                 | 0.43            | 0.934        | 0.402               | 0.69             |
| Mean F2    | 0.400           | 0.453                 | 0.715           | 0.924        | 0.470               | 0.727            |
| Mean F3    | 0.406           | 0.573                 | 0.526           | 0.923        | 0.450               | 0.796            |
| Mean F4    | 0.826           | 0.566                 | 0.909           | 0.757        | 0.125               | 0.364            |
| Dispersion | 0.545           | 0.156                 | 0.744           | 0.687        | 0.128               | 0.336            |

342

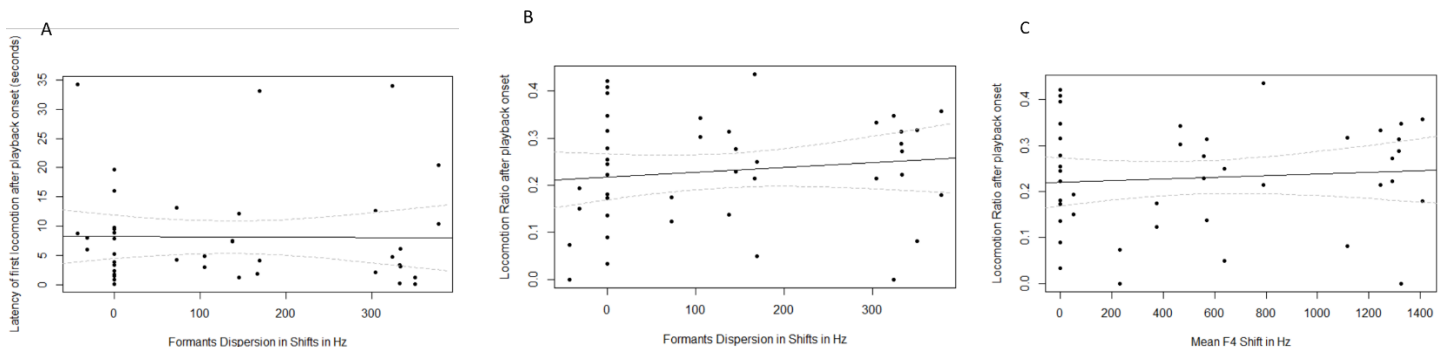

344 Figure 4: Effect of the actual shift in formant dispersion on latency of the first locomotion (A)  
and locomotion ratio (B), and of the shift in mean value of F4 on locomotion ratio (C) after  
346 playback onset over the three conditions: natural voice of the mother (set at 0 Hz), a positive  
shift within the natural range (about 520 HZ above natural F4 Mean), and a positive shift  
348 exceeding the natural range (about 1040 HZ above natural F4 Mean). Ratios were obtained by  
dividing the duration of the behaviour by the total duration of the video sequence. Dots represent  
350 the data, and the black line represent the predicted effect given by the LMM model. In grey are  
given the 95% predicted confidence intervals.

352

## 354 Discussion

356 Mother goats and their kids display mutual recognition, and kids recognise their mother based  
358 on vocal cues from at least five days old (Briefer & McElligott, 2011a). However, the vocal  
360 parameters used for achieving this vocal recognition remain unknown. We investigated  
362 whether goat kids would react to modified versions of their mother's calls, using two types of  
364 changes (to fundamental frequency and formants) and two intensities of modifications (within  
366 the intra-individual variability or exceeding this variability). We found that call rate, locomotion  
368 ratio and looking ratio were affected by the playback onset. However, goat kids responded as  
370 much when exposed to natural maternal vocalisations, compared to when the fundamental  
frequency or the formants were modified. We suggest that goat kids recognise their mother  
vocalisations based on several possible non-exclusive mechanisms: (i) fundamental frequency  
and formants are not involved in maternal recognition in goats (Carlson, Kelly & Couzin,  
2020); (ii) goat kid maternal recognition sensitivity exceeds the shifts we performed (Aubin &  
Jouventin, 2002), (iii) goat kid maternal recognition is based on other vocal features than F0  
and the formants (Sèbe *et al.*, 2011); or (iv) goat kid maternal recognition is based on several  
features and might be more flexible than previously thought, such that when one main feature  
is modified, kids focus on other features (Charrier *et al.*, 2003).

### 372 *Fundamental frequency and formants in maternal recognition*

374 We had predicted that goat fundamental frequency (F0) could be a cue used for individual  
376 recognition, because its contour in mother contact calls shows a high Potential for Individual  
Coding (PIC; start, mean and maximum F0; Briefer & McElligott, 2011b). PIC values greater  
than 1 indicate that the within-individual variation is lower than the between-individual  
variation, and therefore that the feature is suitable for individual recognition. Similarly, third

378 and fourth formants' minimum, mean and maximum values have PIC values  $> 1$  in goat  
379 mother calls (Briefer & McElligott, 2011b), making them suitable as well for individual  
380 recognition. Because we did not find any effect of F0 or formants modification on maternal  
381 recognition, our findings are in line with previous observations suggesting that producing  
382 individualised vocalisations does not always result in individual recognition (Carlson *et al.*,  
383 2020). Indeed, sometimes, less individualised features might be used by receivers to identify  
384 the sender. For example, in pandas (*Ailuropoda melanoleuca*), mean F0 is highly  
385 individualised, but females use amplitude modulations instead for recognition of male  
386 conspecifics (Charlton *et al.*, 2009a). Our results suggest that goat kids might not use F0 and  
387 the formants for individual recognition of their mothers, despite these parameters being highly  
388 individualised.

We expected that kids would react less to modified than natural vocalisation of their mothers.  
390 In order to avoid predators in the wild, it is more adaptive for goat kids to only reply to the  
391 vocalisation of their mothers and not reveal their location to unfamiliar individuals or potential  
392 predators (Briefer & McElligott, 2011a; Padilla de la Torre *et al.*, 2016). In Australian sea lions,  
393 pups look and approach the speaker less when F0 of their mothers' vocalisations have been  
394 changed (of once, twice or three times the standard deviation) than when hearing their  
395 mothers' natural vocalisations (Charrier *et al.*, 2009). By contrast, fur seals pups have a high  
396 tolerance to variation in vocal parameters (Charrier *et al.*, 2003); they respond to their  
397 mothers' calls, even when shifted to a degree to which in return their mother can't recognise  
398 them. In our study, goat kids did not differentiate between natural and modified calls of their  
399 mothers even when the intra-individual variation was exceeded. This might suggest that goat  
400 kids are rather tolerant to variation in parameters, at least those studied here (F0 and  
formants).

402 Goat maternal recognition may alternatively rely on duration, amplitude modulation or  
frequency modulation, which also differ between individuals, , although to a lesser extent than  
404 source-filter parameters (Briefer & McElligott, 2011a). In lambs, suppressing amplitude  
modulation while keeping the natural frequency modulation was found to prevent lambs from  
406 identifying their mother's voice (Sèbe *et al.*, 2011). In fur seals, pups can recognise their  
mother calls despite a suppression of the amplitude modulation, but their recognition ability is  
408 impaired by a reversed temporal frequency pattern (Charrier *et al.*, 2003). In the same study,  
fur seal pups could recognise their mother's call based on the first 25% of the call, but the  
410 recognition was impaired if only 10 or 20% of the call was broadcasted, and there was no  
recognition with only the last 25% of the call (Charrier *et al.*, 2003). In goats, the spectral  
412 energy distribution was also found to be individualised and could be another parameter on  
which maternal recognition could be based (Briefer & McElligott, 2011a).

#### 414 *Effect of the PSOLA based algorithm on the acoustic pattern of goat mothers vocalisations*

416 Despite F0 and formants being theoretically independent of each other (Taylor & Reby, 2010),  
modifying formants using a PSOLA based algorithm had an impact on the mean, maximum  
418 and minimum value of the fundamental frequency, while a modification of fundamental  
frequency impacted the first, third and fourth formant as well as formants dispersion (see  
420 results in Supplementary Material). These results imply that, when measuring the behavioural  
response to the targeted modified factor, there was still a possibility that subjects' behaviour  
422 would reflect on the unwanted modifications of the other factor. However, even in natural goat  
vocalisations, F0 and formants values are also correlated to some extent , (Briefer &  
424 McElligott, 2011a, Supplementary Material 3). The fundamental nature of the algorithm we  
used could explain partially these unwanted effects. PSOLA-based algorithm for frequential  
426 modifications rely on the precision pitch marks (Rudresh *et al.*, 2018) and it has been found to

428 be of insufficient quality for large F0 changes, and particularly very high F0 alterations, by  
430 creating imperfections and serious errors (Owsianny, 2019). Considering how goats F0 are  
432 naturally quite variable and high, and were positively shifted in the present experiment, the  
434 PSOLA algorithm may have produced stimuli where the overall pattern of the call was not  
preserved, particularly in the second shift treatments where the F0-formants relation was  
different from the natural contact calls of mothers. Nevertheless, goat kids responded to our  
shifted modified calls in the same way as natural calls, suggesting that they perceived them  
as natural calls, and do not rely on F0 and formants, which were all modified to some extent in  
our playbacks.

## 436 **Conclusion**

438 To conclude, our results suggest that, even though they are individualised (Briefer &  
440 McElligott, 2011a), source-filter features of the mother's voice are not used as individual key  
442 features in maternal recognition in goats. Further, to our knowledge, our study is the first  
experimental investigation of the implications of source-filter parameters in offspring  
444 recognition of their mothers' call using a PSOLA-based algorithm. Despite the playback itself  
influencing kid behaviour, no difference was found between the reaction to the natural  
446 vocalisations and reactions to modified ones. It is hence likely that goat kid recognition of  
mother calls is facilitated by complex relationships between a suite of parameters, rather than  
individual ones, thus making recognition in varying environmental conditions more robust.

448 **Acknowledgments**

450 E. Briefer was funded by a Swiss National Science Foundation fellowship. We thank the staff  
452 of White Post Farm (<http://whitepostfarmcentre.co.uk/>) for their help and free access to their  
animals.

## Bibliography

454

Aubin, T. & Jouventin, P. (2002). How to vocally identify kin in a crowd: The penguin model. In  
456 *Advances in the Study of Behavior*. 243–277. Elsevier.

456

458

Bates, D., Mächler, M., Bolker, B. & Walker, S. (2015). Fitting Linear Mixed-Effects Models  
Using **lme4**. *J. Stat. Softw.* **67**.

460

Bateson, M. & Martin, P.R. (2021). *Measuring behaviour: an introductory guide*. 4th ed.  
Cambridge, United Kingdom: Cambridge university press.

462

Briefer, E. & McElligott, A.G. (2011a). Mutual mother–offspring vocal recognition in an  
ungulate hider species (*Capra hircus*). *Anim. Cogn.* **14**, 585–598.

464

Briefer, E. & McElligott, A.G. (2011b). Indicators of age, body size and sex in goat kid calls  
revealed using the source–filter theory. *Appl. Anim. Behav. Sci.* **133**, 175–185.

466

Briefer, E.F. & McElligott, A.G. (2012). Social effects on vocal ontogeny in an ungulate, the  
goat, *Capra hircus*. *Anim. Behav.* **83**, 991–1000.

468

Briefer, E.F., Padilla de la Torre, M. & McElligott, A.G. (2012). Mother goats do not forget their  
kids' calls. *Proc. R. Soc. B Biol. Sci.* **279**, 3749–3755.

470

Burke, T.A., Quandt, R.C., Bartley, S.S. & Forshey, B. (2020). The relationship between the  
first harmonic intensity levels among boer goat siblings from birth to weaning. *J. Anim.  
Sci.* **98**, 149–149.

472

Carlson, N.V., Kelly, E.M. & Couzin, I. (2020). Individual vocal recognition across taxa: a  
review of the literature and a look into the future. *Philos. Trans. R. Soc. B Biol. Sci.*  
474 **375**, 20190479.

474

Charlton, B.D., Huang, Y. & Swaisgood, R.R. (2009a). Vocal discrimination of potential mates  
by female giant pandas (*Ailuropoda melanoleuca*). *Biol. Lett.* **5**, 597–599.

476

478

Charlton, B.D., Zhihe, Z. & Snyder, R.J. (2009b). Vocal cues to identity and relatedness in  
giant pandas (*Ailuropoda melanoleuca*). *J. Acoust. Soc. Am.* **126**, 2721–2732.

480

Charrier, I., Mathevon, N. & Jouventin, P. (2003). Vocal signature recognition of mothers by  
fur seal pups. *Anim. Behav.* **65**, 543–550.

482

Charrier, I., Pitcher, B.J. & Harcourt, R.G. (2009). Vocal recognition of mothers by Australian  
sea lion pups: individual signature and environmental constraints. *Anim. Behav.* **78**,  
1127–1134.

484

Favaro, L., Briefer, E.F. & McElligott, A.G. (2014). Artificial Neural Network Approach for  
Revealing Individuality, Group Membership and Age Information in Goat Kid Contact  
486 Calls. *Acta Acust. United Acust.* **100**, 782–789.

488

Ferreira, G., Terrazas, A., Poindron, P., Nowak, R., Orgeur, P. & Lévy, F. (2000). Learning of  
olfactory cues is not necessary for early lamb recognition by the mother. *Physiol.  
Behav.* **69**, 405–412.



- 490 Friard, O. & Gamba, M. (2016). BORIS: a free, versatile open-source event-logging software  
for video/audio coding and live observations. *Methods Ecol. Evol.* **7**, 1325–1330.
- 492 Gokcekus, S., Firth, J.A., Regan, C. & Sheldon, B.C. (2021). Recognising the key role of  
individual recognition in social networks. *Trends Ecol. Evol.* **36**, 1024–1035.
- 494 Guidelines for the treatment of animals in behavioural research and teaching. (2012). *Anim.*  
*Behav.* **83**, 301–309.
- 496 Halekoh, U. & Højsgaard, S. (2014). A kenward-roger approximation and parametric bootstrap  
498 methods for tests in linear mixed models—the R package pbkrtest. *J. Stat. Softw.* **59**, 1–  
30.
- Hartig, F. (2022). DHARMa [WWW Document]. *DHARMa*. URL  
500 <http://florianhartig.github.io/DHARMa/>
- Hernández, H., Terrazas, A., Poindron, P., Ramírez-Vera, S., Flores, J.A., Delgadillo, J.A.,  
502 Vielma, J., Duarte, G., Fernández, I.G., Fitz-Rodríguez, G., Retana-Márquez, S.,  
504 Muñoz-Gutierrez, M. & Serafín, N. (2012). Sensorial and physiological control of  
maternal behavior in small ruminants: sheep and goats. *Trop. Subtrop.*  
*Agroecosystems* **15**, S91–S102.
- 506 Li, Y., Xia, C., Lloyd, H., Li, D. & Zhang, Y. (2017). Identification of vocal individuality in male  
cuckoos using different analytical techniques. *Avian Res.* **8**, 21.
- 508 Linossier, J., Casey, C., Charrier, I., Mathevon, N. & Reichmuth, C. (2021). Maternal  
responses to pup calls in a high-cost lactation species. *Biol. Lett.* **17**, 20210469.
- 510 Owsianny, M. (2019). Perceptual identification of Polish vowels due to F0 changes. *Arch.*  
*Acoust.* **44**.
- 512 Padilla de la Torre, M., Briefer, E.F., Ochocki, B.M., McElligott, A.G. & Reader, T. (2016).  
514 Mother–offspring recognition via contact calls in cattle, *Bos taurus*. *Anim. Behav.* **114**,  
147–154.
- Pitcher, B.J., Briefer, E.F. & McElligott, A.G. (2015). Intrasexual selection drives sensitivity to  
516 pitch, formants and duration in the competitive calls of fallow bucks. *BMC Evol. Biol.*  
**15**, 149.
- 518 Pitcher, B.J., Harcourt, R.G. & Charrier, I. (2012). Individual identity encoding and  
environmental constraints in vocal recognition of pups by Australian sea lion mothers.  
520 *Anim. Behav.* **83**, 681–690.
- Reby, D. & McComb, K. (2003). Anatomical constraints generate honesty: acoustic cues to  
522 age and weight in the roars of red deer stags. *Anim. Behav.* **65**, 519–530.
- Rudresh, S., Vasisht, A., Vijayan, K. & Seelamantula, C.S. (2018). Epoch-synchronous  
524 overlap-add (ESOLA) for time-and pitch-scale modification of speech signals. *ArXiv*  
*Prepr. ArXiv180106492*.
- 526 Sauv e, C.C., Beauplet, G., Hammill, M.O. & Charrier, I. (2015). Mother–pup vocal recognition  
528 in harbour seals: influence of maternal behaviour, pup voice and habitat sound  
properties. *Anim. Behav.* **105**, 109–120.

- 530 Searby, A. & Jouventin, P. (2003). Mother-lamb acoustic recognition in sheep: a frequency  
coding. *Proc. R. Soc. Lond. B Biol. Sci.* **270**, 1765–1771.
- 532 Sèbe, F., Aubin, T., Nowak, R., Sèbe, O., Perrin, G. & Poindron, P. (2011). How and when do  
lambs recognize the bleats of their mothers? *Bioacoustics* **20**, 341–355.
- 534 Sèbe, F., Duboscq, J., Aubin, T., Ligout, S. & Poindron, P. (2010). Early vocal recognition of  
mother by lambs: contribution of low- and high-frequency vocalizations. *Anim. Behav.*  
**79**, 1055–1066.
- 536 Sèbe, F., Nowak, R., Poindron, P. & Aubin, T. (2007). Establishment of vocal communication  
and discrimination between ewes and their lamb in the first two days after parturition.  
538 *Dev. Psychobiol.* **49**, 375–386.
- 540 Siebert, K., Langbein, J., Schön, P.-C., Tuchscherer, A. & Puppe, B. (2011). Degree of social  
isolation affects behavioural and vocal response patterns in dwarf goats (*Capra hircus*).  
*Appl. Anim. Behav. Sci.* **131**, 53–62.
- 542 Tamura, N., Boonkhaw, P., Prayoon, U., Phan, Q.T., Yu, P., Liu, X. & Hayashi, F. (2021).  
544 Geographical variation in squirrel mating calls and their recognition limits in the widely  
distributed species complex. *Behav. Ecol. Sociobiol.* **75**, 97.
- 546 Taylor, A.M. & Reby, D. (2010). The contribution of source–filter theory to mammal vocal  
communication research. *J. Zool.* **280**, 221–236.
- 548 Torriani, M.V.G., Vannoni, E. & McElligott, A.G. (2006). Mother-Young Recognition in an  
Ungulate Hider Species: A Unidirectional Process. *Am. Nat.* **168**, 412–420.
- 550 Yorzinski, J.L. (2017). The cognitive basis of individual recognition. *Curr. Opin. Behav. Sci.*  
**16**, 53–57.
- 552
